# Supplementary material for: Anti-inflammatory treatment in MPN: targeting TNFR1 and TNFR2 in JAK2-V617F–induced disease
Source: PubMed Central journal article supplement — Blood Adv. 2021 Dec 9;5(23):5349–59. doi: 10.1182/bloodadvances.2021004438 (PMC9153051; doi:10.1182/bloodadvances.2021004438), 2021-12-09

## Supplemental Data

### Supplemental methods:

#### Mouse genotyping:

To verify using mice with correct modified genotype, all mice were controlled by PCR analysis. Cre-recombinase (GAC CAG TTG CTC CAG GGT TA, GCA AAG GGA GAC AAG AA ACG T and TCA CAA GCA TTT GGT TTT GAA T), huTNFR1<sub>ecd</sub> (huTNFR1<sub>ecd</sub> TGT CCC ACC ACA CAC AC (for), CTG GCT GTT CCT AGC AT (rev)).

#### Flow cytometry:

Single cell suspensions from peripheral blood were stained for CD3 and CD19 (both BioLegend, San Diego, CA, USA). For analysis of stem cell compartments, single cell suspension of bone marrow and spleen were stained with lineage markers, c-kit, Sca1, CD16/CD32 and CD34 (all BioLegend, San Diego, CA, USA). All samples were analyzed with a FACS Canto II flow cytometer (BD Biosciences).

#### Clonogenic assay:

Lin<sup>-</sup> cells were isolated from total bone marrow of huTNFR1<sub>ecd</sub> x JAK2<sup>+MF</sup> mice by negative selection using MACS beads (Milteny Biotec, Bergisch Gladbach, Germany) and FACS-sorted for Lin<sup>-</sup>ckit<sup>+</sup> cells. Cells were cultured for three days in StemSpanSFEM medium containing mSCF (100ng/mL) and mIL-3 (100ng/mL) and

additional stimulation with  $\alpha$ TNFR1 antibody H398 or  $\alpha$ TNFR2 antibody (each 10  $\mu$ g/mL). After this pre-incubation period, 5,000 cells were seeded in MethoCult™ GF M3434 containing mSCF (100ng/mL) and mL-3 (100ng/mL) and  $\alpha$ TNFR1 or  $\alpha$ TNFR2 antibody (10  $\mu$ g/mL). Colony formation was analyzed seven days after start of treatment. Non-anti-TNFR1/2 treated cells were used as control.

### **Hepcidin ELISA:**

Hepcidin concentrations in serum of JAK2<sup>+VF</sup> and JAK2<sup>WT</sup> mice were determined by applying Hepcidin Murine-Compete™ ELISA Kit (Intrinsic LifeSciences, La Jolla, CA, USA). Assay was performed according to the manufacturer's instructions.

### **Granulocyte migration**

Granulocytes were isolated by Ficoll-paque density gradient centrifugation from peripheral blood of JAK2-V617F-positive MPN patients or healthy controls. After isolation, cells were rested for 60 min in starvation medium (0.5% fetal bovine serum) and incubated with and without  $\alpha$ TNFR1 H398 or  $\alpha$ TNFR2 antibody (Monoclonal Mouse IgG<sub>1</sub> Clone # 22210; R&D Systems, Inc, Minneapolis, MN, USA) (both c = 10mg/mL). Migration was performed along CXCL12 (c = 100 ng/mL), TNF $\alpha$  (c = 10 ng/mL), CXCL12+TNF $\alpha$  (combi), combi +  $\alpha$ TNFR1 antibody, combi +  $\alpha$ TNFR2 antibody gradients for 3 hours (pore size: 3 $\mu$ m). After migration, cells were labeled with calcein AM (2  $\mu$ M) at 37°C. Fluorescence of the samples was monitored using a Synergy HT plate reader (BioTek).

## TNFR1/2 pathway inhibition

Hel cells or isolated splenocytes from JAK2<sup>+VF</sup> mice were incubated with different concentrations of  $\alpha$ TNFR1 antibody H398 (Hel cells) or  $\alpha$ TNFR2 antibody TR75-54.7 (splenocytes) for 3 hours in serum-reduced medium (RPMI+0.5%FCS) at 37°C and 5%CO<sub>2</sub>. After incubation, cells were stimulated with 50 ng/mL TNF $\alpha$  for 10 min at 37°C and 5%CO<sub>2</sub>. Reaction was stopped by adding ice-cold PBS. After centrifugation cells were lysed and phosphorylation of p38 and p65 analyzed by immunoblotting.

## Immunoblotting

Isolated protein of Hel cells (30 $\mu$ g) or splenocytes (50 $\mu$ g) were separated by SDS-PAGE and transferred tonitrocellulose membranes. Membranes were blocked with 5%BSA in TTBS at RT and incubated with primary antibody overnight at 4°C. After analysis of phospho-protein signals, membranes were stripped and incubated again with antibodies for total protein and GAPDH as loading control. Blots were scanned with a chemoluminescence imager (Peqlab) and inversed with ImageJ 1.52a software.

**Table: Immunoblotting antibodies**

| Antibody                    | Supplier / Catalog number                            | Dilution |
|-----------------------------|------------------------------------------------------|----------|
| Phospho-p38 (Tyr180/182)    | Cell Signaling Technology, Danvers, MA, USA; 4631    | 1/1000   |
| p38                         | Cell Signaling Technology; 9212                      | 1/1000   |
| Phospho-p65 (Ser536)        | Cell Signaling Technology; 3033                      | 1/1000   |
| p65                         | Cell Signaling Technology; 8242                      | 1/500    |
| GAPDH                       | Meridian Bioscience, Cincinnati, OH, USA; H86504M    | 1/5000   |
| Anti-rabbit IgG, HRP-linked | Cell Signaling Technology; 7074                      | 1/2000   |
| Anti-mouse-IgGk BP-HRP      | Santa Cruz Biotechnology, Dallas, TX, USA; sc-516102 | 1/2000   |

**Table S1. Serum concentrations of cytokines/chemokines in JAK2<sup>+VF</sup> mice upon  $\alpha$ TNFR2 treatment**

Mean cytokine concentrations of serum samples (pg/mL) measured by Eve Technologies Corporation (Mouse Cytokine Array/Chemokine Array 31-Plex; Calgary, AB, Canada), standard error of mean and fold change of mean cytokine concentrations in JAK2<sup>+VF</sup> versus JAK2<sup>WT</sup>, JAK2<sup>+VF</sup> versus  $\alpha$ TNFR2-treated JAK2<sup>+VF</sup>, and JAK2<sup>+VF</sup> versus IgG treated JAK2<sup>+VF</sup> mice. Untreated JAK2<sup>WT</sup> mice (n = 4-5), untreated JAK2<sup>+VF</sup> mice (n = 4-10),  $\alpha$ TNFR2 antibody treated JAK2<sup>+VF</sup> mice (n = 3) and IgG treated JAK2<sup>+VF</sup> mice (n = 3). Figures indicated by Eve Technologies to be out of standard range and interpolated values were excluded. A minimum of n = 3 measurements of cytokine concentrations to calculate the mean was required. n.e.: not evaluable.

| Cytokines   | JAK2 <sup>WT</sup> |                           | JAK2 <sup>+VF</sup> |                           | JAK2 <sup>+VF</sup> vs JAK2 <sup>WT</sup> | αTNFR2-treated |                           | JAK2 <sup>+VF</sup> vs αTNFR2-treated | IgG-treated  |                           | JAK2 <sup>+VF</sup> vs IgG-treated |
|-------------|--------------------|---------------------------|---------------------|---------------------------|-------------------------------------------|----------------|---------------------------|---------------------------------------|--------------|---------------------------|------------------------------------|
|             | Mean [pg/mL]       | Std error of mean [pg/mL] | Mean [pg/mL]        | Std error of mean [pg/mL] | Fold change                               | Mean [pg/mL]   | Std error of mean [pg/mL] | Fold change                           | Mean [pg/mL] | Std error of mean [pg/mL] | Fold change                        |
| CCL2        | 41.47              | 5.85                      | 99.94               | 22.19                     | 2.41                                      | 48.37          | 6.95                      | 0.48                                  | 71.67        | 8.70                      | 0.72                               |
| CCL3        | 110.79             | 12.00                     | 122.94              | 14.79                     | 1.11                                      | 153.52         | 27.49                     | 1.25                                  | 167.95       | 25.53                     | 1.37                               |
| CCL5        | 27.33              | 3.07                      | 44.27               | 5.77                      | 1.62                                      | 133.28         | 92.33                     | 3.01                                  | 97.86        | 52.10                     | 2.21                               |
| CCL11       | 1105.20            | 133.02                    | 3303.04             | 1034.51                   | 2.99                                      | 1488.52        | 642.91                    | 0.45                                  | n.e          | n.e.                      |                                    |
| CXCL1       | 673.16             | 208.88                    | 1176.29             | 332.81                    | 1.75                                      | 972.42         | 277.88                    | 0.83                                  | 1201.76      | 77.78                     | 1.02                               |
| CXCL2       | 140.92             | 32.67                     | 173.37              | 16.84                     | 1.23                                      | 1826.04        | 642.25                    | 10.53                                 | 118.50       | 20.96                     | 0.68                               |
| CXCL5       | 2860.92            | 1845.00                   | 10853.52            | 1377.54                   | 3.79                                      | 4048.80        | 667.15                    | 0.37                                  | 11199.59     | 3789.51                   | 1.03                               |
| CXCL9       | 138.75             | 74.46                     | 545.04              | 219.70                    | 3.93                                      | 163.83         | 40.47                     | 0.30                                  | 447.84       | 88.06                     | 0.82                               |
| CXCL10      | 110.68             | 8.59                      | 299.25              | 24.16                     | 2.70                                      | 222.24         | 31.16                     | 0.74                                  | 365.42       | 32.95                     | 1.22                               |
| G-CSF       | 594.46             | 138.32                    | 836.14              | 208.19                    | 1.41                                      | 626.33         | 169.60                    | 0.75                                  | 1070.28      | 411.73                    | 1.28                               |
| IFNγ        | 2.82               | 0.44                      | 2.65                | 1.06                      | 0.94                                      | 9.49           | 2.24                      | 3.59                                  | 7.38         | 2.44                      | 2.79                               |
| IL-1α       | 139.32             | 26.01                     | 675.27              | 165.04                    | 4.85                                      | 1234.85        | 663.88                    | 1.83                                  | 773.48       | 269.12                    | 1.15                               |
| IL-2        | 24.52              | 6.81                      | 16.65               | 1.07                      | 0.68                                      | 28.79          | 8.97                      | 1.73                                  | 53.27        | 7.98                      | 3.20                               |
| IL-5        | 33.90              | 9.47                      | 14.06               | 3.61                      | 0.41                                      | 9.82           | 0.65                      | 0.70                                  | 73.83        | 35.64                     | 5.25                               |
| IL-6        | 18.68              | 8.92                      | 121.92              | 102.25                    | 6.53                                      | 75.56          | 55.30                     | 0.62                                  | 30.11        | 9.45                      | 0.25                               |
| IL-7        | 6.07               | 1.32                      | 6.16                | 0.92                      | 1.02                                      | 7.65           | 2.68                      | 1.24                                  | 12.48        | 0.59                      | 2.03                               |
| IL-9        | 24.34              | 0.59                      | 24.53               | 5.02                      | 1.01                                      | 19.00          | 3.15                      | 0.77                                  | 40.88        | 4.86                      | 1.67                               |
| IL-12 (p40) | 14.65              | 3.22                      | 25.20               | 8.06                      | 1.72                                      | 752.58         | 466.36                    | 29.87                                 | 36.29        | 4.36                      | 1.44                               |
| IL-13       | 46.21              | 6.99                      | 58.57               | 4.59                      | 1.27                                      | 59.67          | 3.05                      | 1.02                                  | 91.77        | 6.88                      | 1.57                               |
| M-CSF       | 17.03              | 5.28                      | 15.63               | 5.04                      | 0.92                                      | 726.92         | 375.54                    | 46.51                                 | 49.63        | 0.00                      | 3.18                               |

**Table S2. Clinical characteristics of JAK2-V617F-positive MPN patients**

| UPN | Sex | Age | Diagnosis | Treatment          |
|-----|-----|-----|-----------|--------------------|
| P1  | m   | 55  | PV        | HU + Anticoagulant |
| P2  | m   | 48  | PV        | ASA + Phlebotomy   |
| P3  | f   | 47  | ET        | ASA                |
| P4  | f   | 49  | PV        | HU + Phlebotomy    |
| P5  | f   | 61  | ET        | HU                 |
| P6  | f   | 80  | ET        | HU                 |

UPN Unique Patient Number

HU Hydroxyurea

ASA Acetylsalicylic acid

## Supplemental Figures

### Figure S1.: Serum concentration of hepcidin

**(A)** Hepcidin ELISA using serum of JAK2<sup>WT</sup> mice (n = 5), JAK2<sup>+VF</sup> mice (n = 6),  $\alpha$ TNFR2 treated JAK2<sup>+VF</sup> mice (n = 3) and IgG treated JAK2<sup>+VF</sup> mice (n = 3)

**(B)** Hepcidin ELISA using serum of huTNFR1<sub>ecd</sub> x JAK2<sup>WT</sup> mice, huTNFR1<sub>ecd</sub> x JAK2<sup>+VF</sup> mice,  $\alpha$ TNFR1 treated huTNFR1<sub>ecd</sub> x JAK2<sup>+VF</sup> mice and IgG treated huTNFR1<sub>ecd</sub> x JAK2<sup>+VF</sup> mice (n = 3 in each group)

### Figure S2. MCV and RBC in huTNFR1<sub>ecd</sub> x JAK2<sup>+VF</sup> mice upon $\alpha$ TNFR1 treatment and in JAK2<sup>+VF</sup> mice upon $\alpha$ TNFR2 treatment

**(A)** MCV analysis of untreated JAK2<sup>+VF</sup> (n = 15), untreated JAK2<sup>WT</sup> (n = 14),  $\alpha$ TNFR2 antibody treated JAK2<sup>+VF</sup> (n = 5) and IgG treated JAK2<sup>+VF</sup> (n = 4).

**(B)** RBC analysis of untreated JAK2<sup>+VF</sup> (n = 15), untreated JAK2<sup>WT</sup> (n = 14),  $\alpha$ TNFR2 antibody treated JAK2<sup>+VF</sup> (n = 5) and IgG treated JAK2<sup>+VF</sup> (n = 4).

**(C)** MCV analysis of untreated huTNFR1<sub>ecd</sub> x JAK2<sup>+VF</sup> (n = 10), untreated huTNFR1<sub>ecd</sub> x JAK2<sup>WT</sup> (n = 8),  $\alpha$ TNFR1 antibody treated huTNFR1<sub>ecd</sub> x JAK2<sup>+VF</sup> (n = 8) and IgG treated huTNFR1<sub>ecd</sub> x JAK2<sup>+VF</sup> (n = 9).

**(D)** RBC analysis of untreated huTNFR1<sub>ecd</sub> x JAK2<sup>+VF</sup> (n = 10), untreated huTNFR1<sub>ecd</sub> x JAK2<sup>WT</sup> (n = 8),  $\alpha$ TNFR1 antibody treated huTNFR1<sub>ecd</sub> x JAK2<sup>+VF</sup> (n = 8) and IgG treated huTNFR1<sub>ecd</sub> x JAK2<sup>+VF</sup> (n = 9).

Statistical significance is given as \* p < 0.05, \*\* p < 0.01, \*\*\* p < 0.001 and \*\*\*\* p < 0.0001.

The MCV of both groups similarly declined ( $\alpha$ TNFR1: mean 36.0 to mean 32.7 fl, IgG: mean 36.2 to mean 33.0 fl) to comparable levels of 12 weeks old untreated JAK2<sup>+NF</sup> mice (mean 31.3 fl) (Suppl. Figure 2C). RBC increased during treatment in both groups, but this effect was much stronger and homogeneous in IgG treated mice (IgG: 16.9 – 19.9×10<sup>12</sup> cells/L; p = 0.0012;  $\alpha$ TNFR1: 17.3 – 18.0×10<sup>12</sup> cells/L; p = 0.4418). Nevertheless, there was no significant difference between the means at the end of treatment (p = 0.1589) (Suppl. Figure 2D).

**Figure S3. CFU-GM and BFU colonies; CD3 and CD19 positive cells.**

**(A-B)** Colony forming unit assays of untreated and  $\alpha$ TNFR1/ $\alpha$ TNFR2 treated Lin-ckit+ bone marrow cells of huTNFR1<sub>ecd</sub> x JAK2<sup>+NF</sup> mice. Numbers of CFU-GM and BFU were counted and depicted (n = 3).

**(C-D)** Total T- and B-cell numbers in peripheral blood of IgG (n = 4) and  $\alpha$ TNFR2 antibody treated mice (n = 4).

**(E-F)** Total T- and B-cell numbers in peripheral blood of IgG (n = 5) and  $\alpha$ TNFR1 antibody treated mice (n = 5).

**Figure S4. Stem and progenitor cell distribution in spleen of in JAK2<sup>+NF</sup> mice upon  $\alpha$ TNFR2 treatment and huTNFR1<sub>ecd</sub> x JAK2<sup>+NF</sup> mice upon  $\alpha$ TNFR1 treatment.**



Presented cell numbers of compartments investigated were normalized to  $10^6$  live cells.

**(A)** Analysis of spleen derived stem and progenitor cells from untreated JAK2<sup>WT</sup> (n = 4), untreated JAK2<sup>V/F</sup> (n = 5),  $\alpha$ TNFR2 antibody treated JAK2<sup>V/F</sup> (n = 3) and IgG treated JAK2<sup>V/F</sup> (n = 3) mice.

**(B)** Analysis of spleen derived stem and progenitor cells from untreated huTNFR1<sub>ecd</sub> x JAK2<sup>WT</sup> (n = 3), untreated huTNFR1<sub>ecd</sub> x JAK2<sup>V/F</sup> (n = 2),  $\alpha$ TNFR1 antibody treated huTNFR1<sub>ecd</sub> x JAK2<sup>V/F</sup> (n = 3) and IgG treated huTNFR1<sub>ecd</sub> x JAK2<sup>V/F</sup> (n = 3) mice.

**(C)** Schematic representation of gating schemes using representative dot plots.

**Figure S5. Human Granulocyte migration along CXCL12/TNF $\alpha$  gradient upon  $\alpha$ TNFR1 or  $\alpha$ TNFR2 inhibition**

Depicted are number of migrated cells after 3 hours of migration: Light grey: healthy controls: no chemoattractant (n = 6); CXCL12 only (n = 6); TNF $\alpha$  only (n = 6); CXCL12 + TNF $\alpha$  (n = 6); CXCL12 + TNF $\alpha$  +  $\alpha$  TNFR1 Ab (n = 6); CXCL12 + TNF $\alpha$  +  $\alpha$ TNFR2 Ab (n = 5). Dark grey JAK2-V617F patients: no chemoattractant (n = 6); CXCL12 only (n = 6); TNF $\alpha$  only (n = 6); CXCL12 + TNF $\alpha$  (n = 6); CXCL12 + TNF $\alpha$  +  $\alpha$  TNFR1 Ab (n = 6); CXCL12 + TNF $\alpha$  +  $\alpha$ TNFR2 Ab (n = 5).

**Figure S6. Intracellular pathway inhibition upon treatment using TNFR2 or TNFR1 antibodies in Hel cells and murine splenocytes upon TNF $\alpha$  stimulation**

**(A)** Immunoblot of isolated splenocytes from JAK2<sup>V/F</sup> mice depicting phosphorylation of p38 and of p65 (NF $\kappa$ B) after  $\alpha$ TNFR2 incubation and TNF $\alpha$  stimulation.

**(B)** Immunoblot of He1 cells depicting phosphorylation of p38 and of p65 (NF $\kappa$ B) after  $\alpha$ TNFR1 incubation and TNF $\alpha$  stimulation.

# Suppl. Figure 1

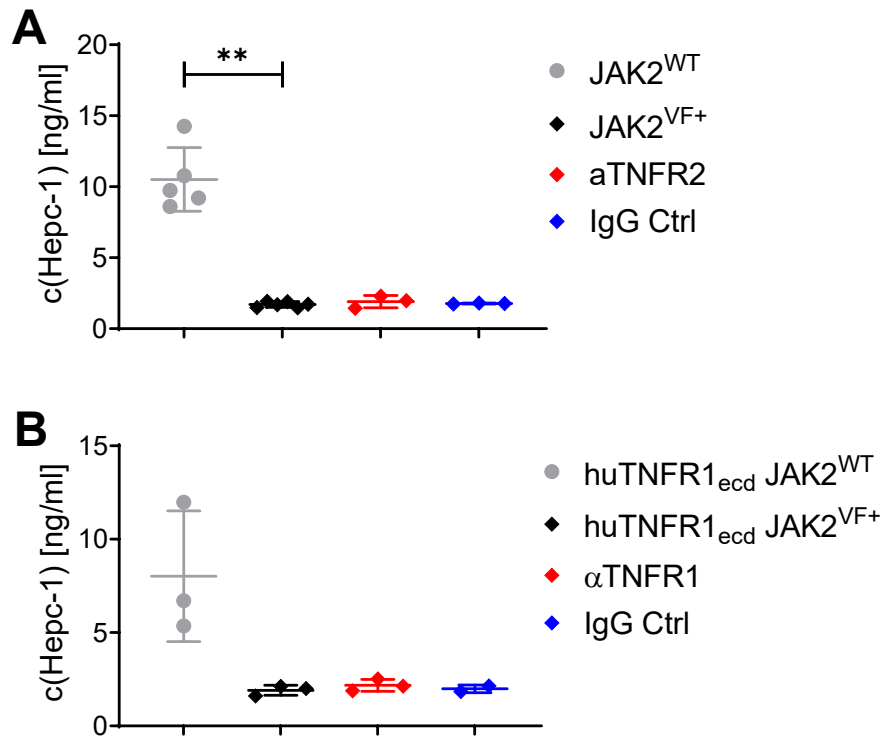

# Suppl. Figure 2

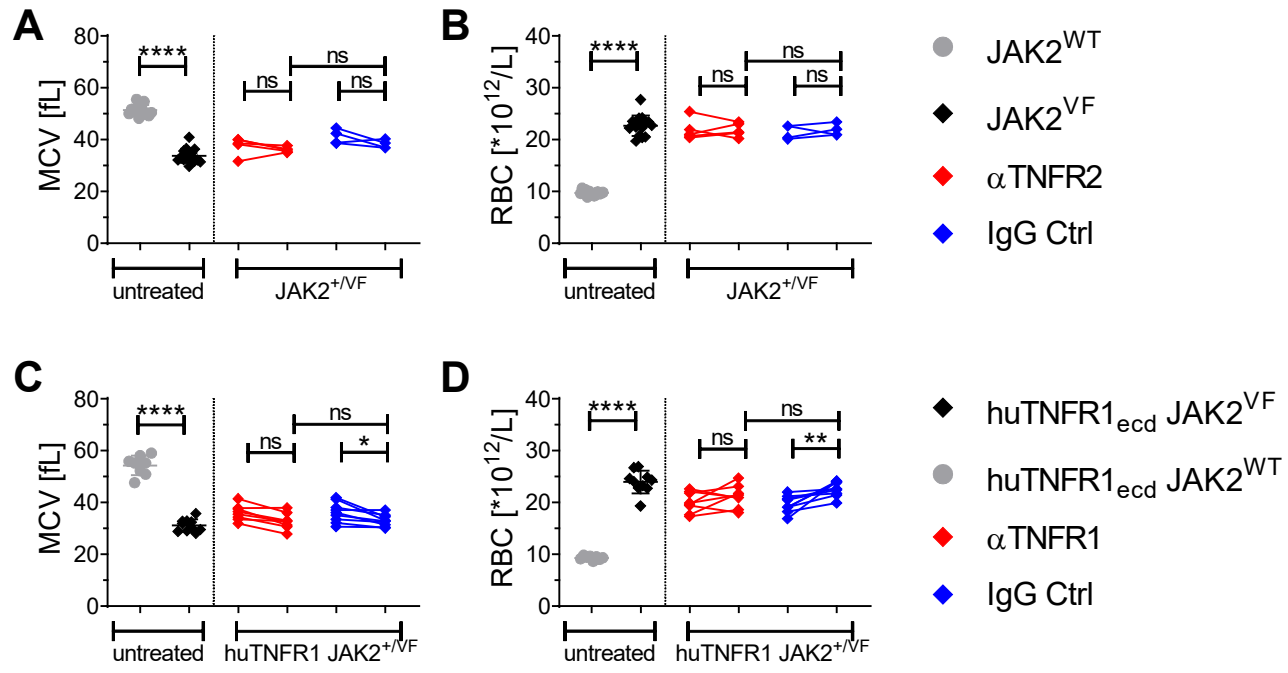

# Suppl. Figure 3

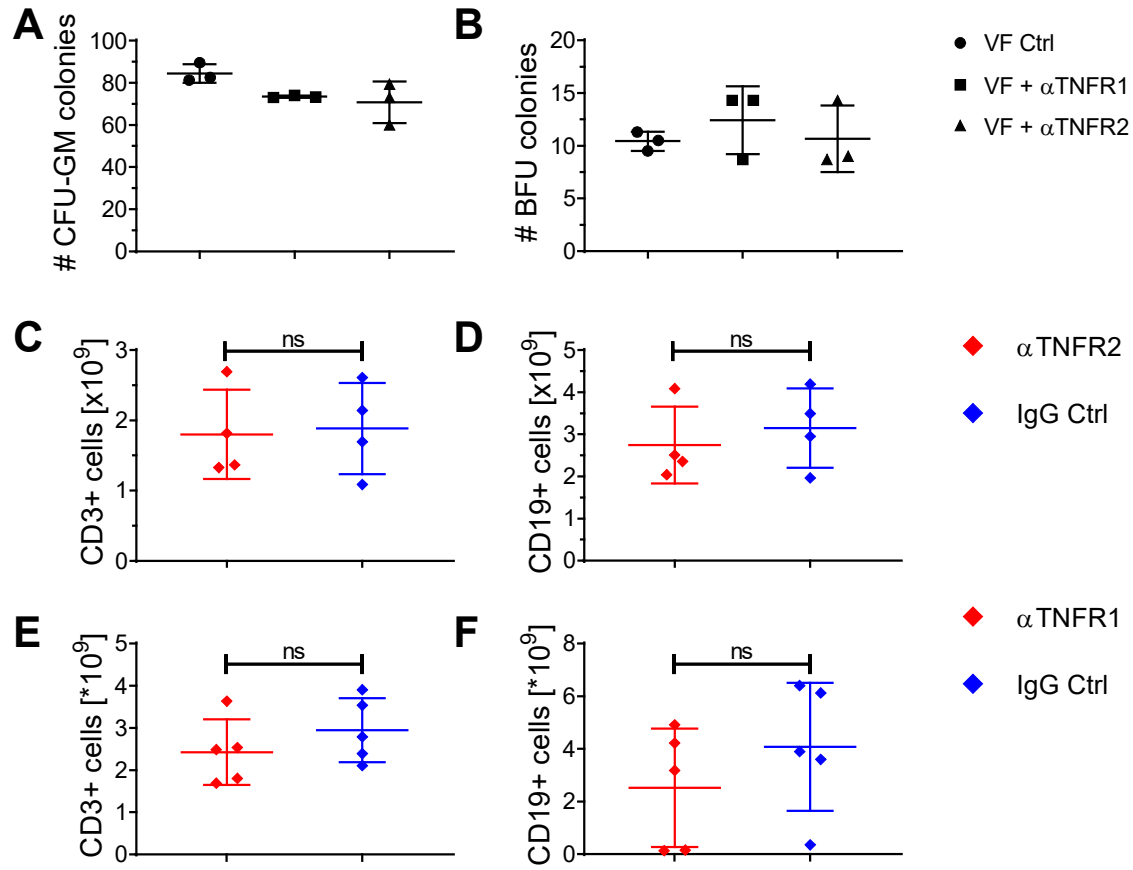

# Suppl. Figure 4

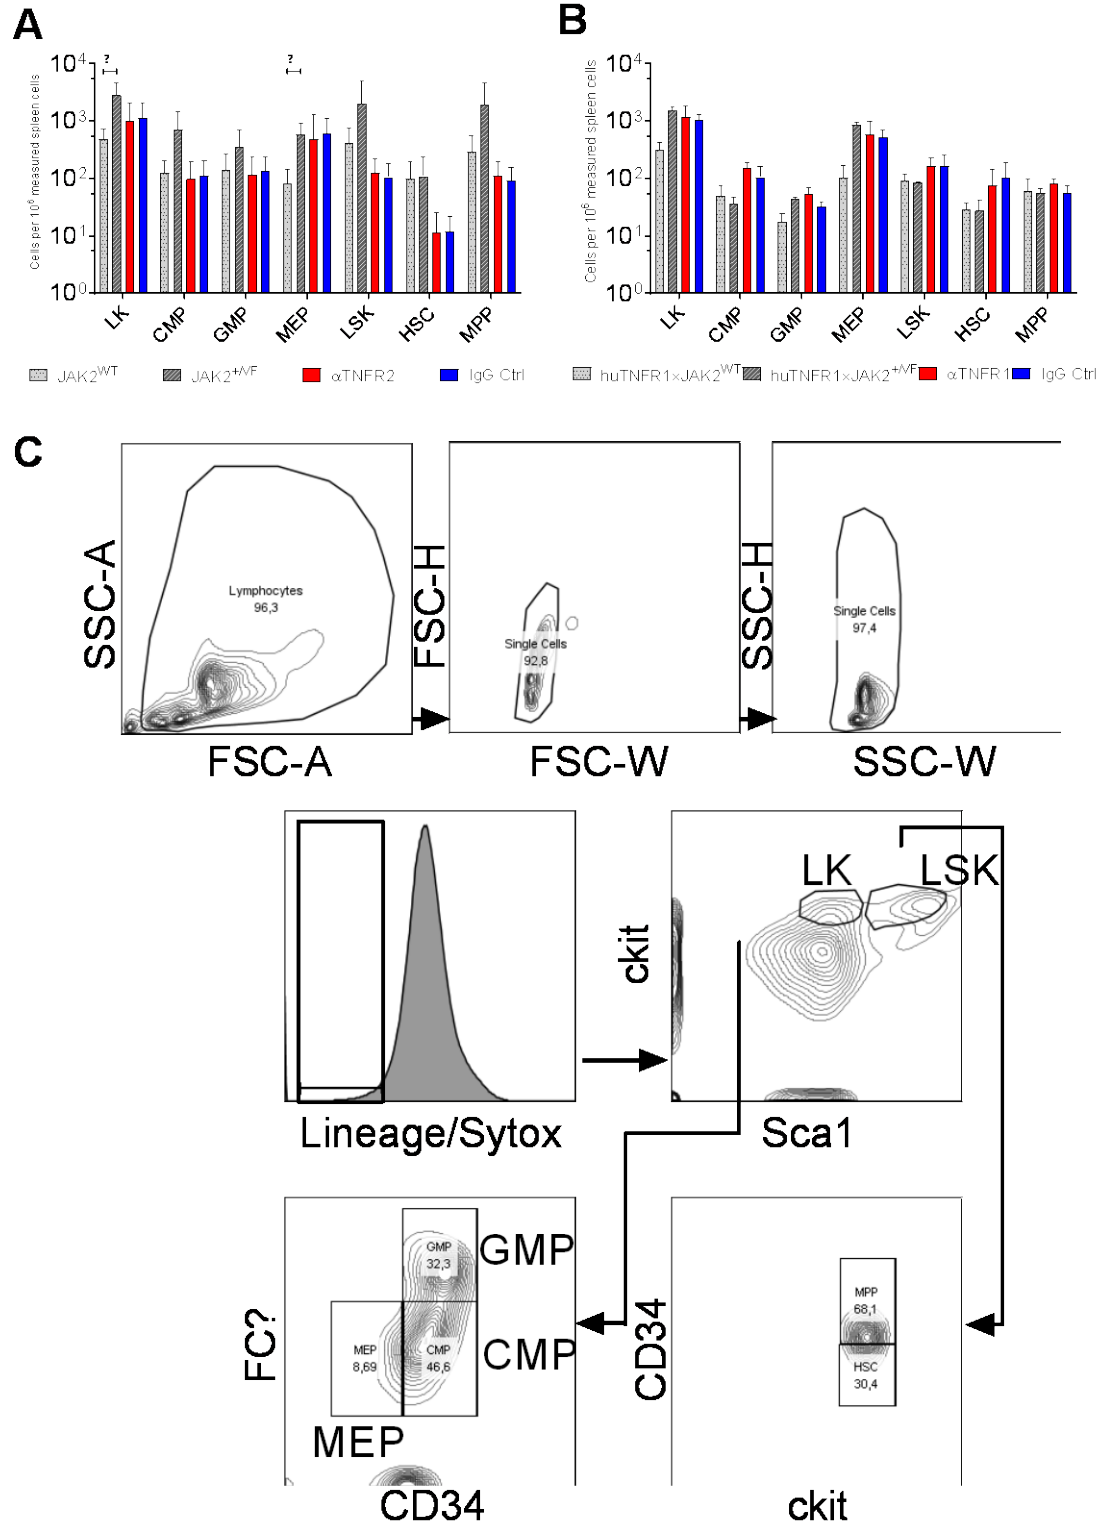

# Suppl. Figure 5

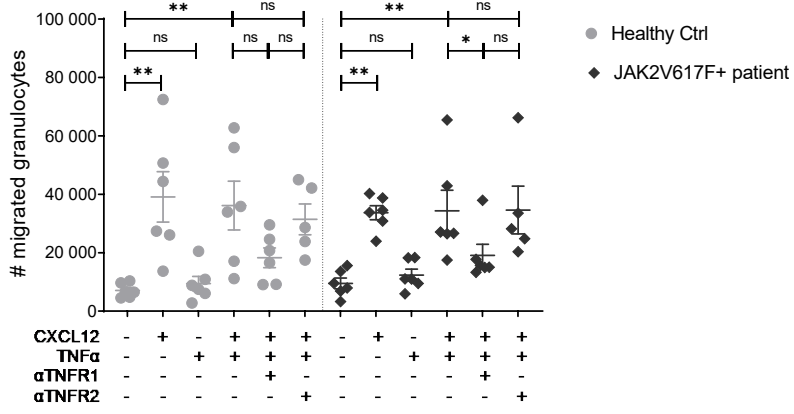

# Suppl. Figure 6

## A

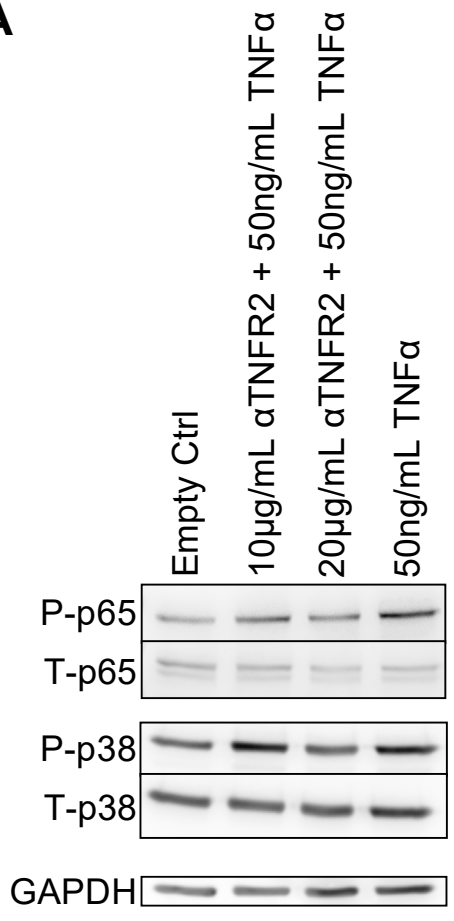

## B

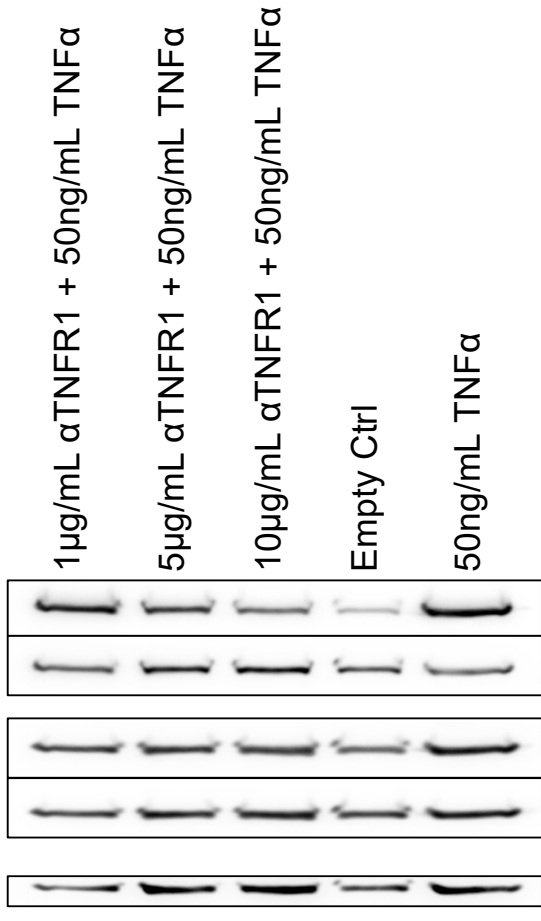

Supplement: advancesADV2021004438-suppl1.pdf [file advancesADV2021004438-suppl1.pdf]
